# Supplementary material for: Search for genetic variations that allow populations to thrive in high-altitude environment of Caucasus highlands
Source: Research Square preprint supplement (doi:10.21203/rs.3.rs-7766645/v1), 2025-10-22
Supplement: Supplementary file 1 [file 860afc57f8f70ee64a2c1fb8.xlsx]

## Sheet:  File 1
Search for genetic variations that allow populations to thrive in high-altitude environment of Caucasus highlands. Genetica. An International Journal of Genetics and Evolution. Murat Dzhaubermezov. Russian Federation, Republic of Bashkortostan, Ufa city, Lenin Street, 87, apt. 32, postal code 450091. E-mail: murat-kbr@mail.ru.
Supplementary Data file 1. Tourist clusters of the North Caucasus and altitudes above sea level
Region of Russia	Caucasus resort	Mountain	Name of the cable car station/viewpoint	Altitude above sea level
Kabardino-Balkaria	Elbrus region	Elbrus	Polyana Azau	2350
			Horizon	3000
			Mir	3500
			Garabashi	3847
		Cheget	Polyana Cheget	2100
			Cheget-2	2750
			Cheget-3	3000
Karachay-Cherkessia	Dombay	Musa-Achitara	Polyana Dombay	1600
			1st stage	2270
			2nd stage	3035
			3rd stage	3170
	Arkhyz	Abishira-Akhuba ridge	Sputnik	1770
			Green Planet	1930
			Milky Way	2250
			Orbit	3030
		Temir-Kulak	Northern Lights	2350
			Soyuz	2550
			Apollo	2840
North Ossetia	Cey	Adaykhokh		2500
Dagestan	Chindircero	Chindircero		2497
Adygea	Lago-Naki	Lago-Naki plateau		up to 2200
Krasnodar region	Rosa Khutor	Aibga	Upper City	1460
			Upper City	2200
			Black Pyramid	2375

## Sheet:  File 2
Supplementary Data File 2. iSAFE value for genetic variants of the studied locus in the Balkar population
(variants with iSAFE value > 0.1 are highlighted)
POS	iSAFE	DAF	rs ID
231350017	0.21915988620522023	0.5706521739130435	rs2250749
231350212	0.21915988620522023	0.5706521739130435	rs2250734
231352778	0.21915988620522023	0.5706521739130435	rs2437150
231357941	0.21915988620522023	0.5706521739130435	rs2247124
231395730	0.21915988620522023	0.5706521739130435	rs2486732
231396541	0.21915988620522023	0.5706521739130435	rs2491410
231397450	0.21915988620522023	0.5706521739130435	rs1416914
231357556	0.21758757469260462	0.5815217391304348	rs2749723
231366564	0.21758757469260462	0.5815217391304348	rs1435166
231375024	0.21758757469260462	0.5815217391304348	new
231382930	0.21758757469260462	0.5815217391304348	rs2486739
231386988	0.21758757469260462	0.5815217391304348	rs2749700
231390744	0.21758757469260462	0.5815217391304348	rs2739511
231384405	0.21701507372816992	0.5706521739130435	rs1453242404
231341724	0.20531775745958436	0.5597826086956522	rs4486439
231341043	0.2035341410157074	0.5706521739130435	rs11122273
231407429	0.20230526823261535	0.592391304347826	rs2808608
231412313	0.20230526823261535	0.592391304347826	rs2790867
231414422	0.20230526823261535	0.592391304347826	rs2808614
231414425	0.20230526823261535	0.592391304347826	rs2808615
231406171	0.19839440123479352	0.6086956521739131	rs2355867
231419247	0.1951815785521705	0.5652173913043478	rs2808616
231368565	0.19364652031213825	0.592391304347826	rs2066140
231380704	0.19364652031213825	0.592391304347826	rs2486741
231391424	0.19364652031213825	0.592391304347826	rs2749706
231392059	0.19364652031213825	0.592391304347826	rs2248649
231392366	0.19364652031213825	0.592391304347826	rs2998427
231393171	0.19364652031213825	0.592391304347826	rs5781647
231393745	0.19364652031213825	0.592391304347826	rs2790886
231466456	0.17209957394705427	0.6304347826086957	rs1769795
231471136	0.17209957394705427	0.6304347826086957	rs2790860
231474293	0.17209957394705427	0.6304347826086957	rs1769798
231453252	0.1632174375832594	0.6195652173913043	rs1765814
231323732	0.1616999325849036	0.5543478260869565	rs6541266
231330282	0.1616999325849036	0.5543478260869565	rs10864676
231332860	0.1616999325849036	0.5543478260869565	rs953
231334904	0.1616999325849036	0.5543478260869565	rs10489609
231515529	0.15666504792749547	0.5978260869565217	rs1765795
231487727	0.15512684613937452	0.6086956521739131	rs1765797
231497405	0.15512684613937452	0.6086956521739131	rs1765787
231498611	0.15512684613937452	0.6086956521739131	rs1765786
231499512	0.15512684613937452	0.6086956521739131	rs1765785
231327455	0.14361257138378491	0.44021739130434784	rs7546511
231597941	0.10806781185719082	0.6630434782608695	rs1655297
231600199	0.10806781185719082	0.6630434782608695	rs34001714
231600865	0.10806781185719082	0.6630434782608695	rs9651124
231601954	0.10806781185719082	0.6630434782608695	rs6656071
231602083	0.10806781185719082	0.6630434782608695	rs6679985
231602144	0.10806781185719082	0.6630434782608695	rs6668915
231602464	0.10806781185719082	0.6630434782608695	rs6682685
231602639	0.10806781185719082	0.6630434782608695	rs6674294
231602819	0.10806781185719082	0.6630434782608695	rs6683094
231598411	0.10721662718379438	0.42391304347826086	rs61836893
231597567	0.10321681080140235	0.6467391304347826	rs6690633
231607935	0.0945562942608876	0.6630434782608695
231616321	0.0945562942608876	0.6630434782608695
231617541	0.0945562942608876	0.6630434782608695
231619715	0.0945562942608876	0.6630434782608695
231621314	0.0945562942608876	0.6630434782608695
231200378	0.07919505682029623	0.9293478260869565
231595597	0.07830187985230776	0.5869565217391305
231470416	0.07767465951112823	0.8043478260869565
231437522	0.07703895397802657	0.7934782608695652
231442107	0.07703895397802657	0.7934782608695652
231444640	0.07703895397802657	0.7934782608695652
231445839	0.07703895397802657	0.7934782608695652
231446581	0.07703895397802657	0.7934782608695652
231595782	0.07566944695119035	0.5978260869565217
231595885	0.07566944695119035	0.5978260869565217
231595984	0.07566944695119035	0.5978260869565217
231595996	0.07566944695119035	0.5978260869565217
231596415	0.07566944695119035	0.5978260869565217
231187272	0.07295938610076608	0.9347826086956522
231226639	0.06489107845498635	0.021739130434782608
231261552	0.06489107845498635	0.021739130434782608
231264576	0.06489107845498635	0.021739130434782608
231274336	0.06489107845498635	0.021739130434782608
231146299	0.06099056330932977	0.02717391304347826
231199749	0.05047670528903028	0.021739130434782608
231284531	0.03906884879900349	0.021739130434782608
231145259	0.019595096501334112	0.32065217391304346
231207125	0.019399505488054237	0.8260869565217391
231135983	0.019119067750087503	0.32065217391304346
231130714	0.01816582565163885	0.6086956521739131
231190340	0.0158431188042806	0.5760869565217391
231199851	0.015307163712214543	0.8097826086956522
231200787	0.015307163712214543	0.8097826086956522
231108182	0.014908626309302245	0.46195652173913043
231070885	0.014813847042894696	0.11956521739130435
231150604	0.01459341890778693	0.7554347826086957
231108720	0.014220772878798409	0.4673913043478261
231188795	0.012730840953803436	0.8206521739130435
231188804	0.012730840953803436	0.8206521739130435
231190033	0.012730840953803436	0.8206521739130435
231192035	0.012730840953803436	0.8206521739130435
231143107	0.011890663281425122	0.44565217391304346
231144704	0.011890663281425122	0.44565217391304346
231145071	0.011890663281425122	0.44565217391304346
231145555	0.011890663281425122	0.44565217391304346
231107465	0.011140688527966403	0.7391304347826086
231143039	0.011127511356822807	0.43478260869565216
231228825	0.01105026008294744	0.13043478260869565
231148382	0.010776680491004238	0.4891304347826087
231148417	0.010776680491004238	0.4891304347826087
231137804	0.010648259144334447	0.45652173913043476
231137910	0.010648259144334447	0.45652173913043476
231051285	0.010575703353178818	0.28804347826086957
231069272	0.010575703353178818	0.28804347826086957
231094272	0.008852160727128853	0.8478260869565217
231097266	0.008852160727128853	0.8478260869565217
231066017	0.00866933624951455	0.30978260869565216
231191920	0.008602100393459208	0.8858695652173914
231223513	0.008320386884824867	0.07608695652173914
231075813	0.008230271220518165	0.875
231078717	0.008230271220518165	0.875
231109054	0.00750933184401595	0.016304347826086956
231054752	0.006032073024924797	0.717391304347826
231046732	0.005055618824854747	0.45108695652173914
231063330	0.003234055130668148	0.8369565217391305
231110865	0.002062540119685521	0.03260869565217391

## Sheet:  File 3
Supplementary Data File 3. iSAFE value for genetic variants of the studied locus in the Karachay population
(variants with iSAFE value > 0.1 are highlighted)
POS	iSAFE	DAF	rs ID
231374565	0.20576777214957354	0.06896551724137931	rs183616633
231484520	0.20576777214957354	0.06896551724137931	new
231607134	0.20576777214957354	0.06896551724137931	new
231642442	0.20576777214957354	0.06896551724137931	rs148596923
231654295	0.20576777214957354	0.06896551724137931	rs187890664
231185302	0.1959952699751903	0.08620689655172414	rs41315434
231186202	0.1959952699751903	0.08620689655172414	rs72750750
231240905	0.17954569878339038	0.08045977011494253	rs34076086
231303322	0.17954569878339038	0.08045977011494253	rs35035487
231322721	0.1767569857870795	0.09770114942528736	rs34544092
231371298	0.1767569857870795	0.09770114942528736	rs35058288
231283977	0.1726965543783094	0.08620689655172414	rs777105216
231085228	0.17259004186262794	0.05172413793103448	rs115239256
231239646	0.15508845496324541	0.10344827586206896	rs35100686
231298396	0.15508845496324541	0.10344827586206896	rs12118342
231290918	0.1502589830284618	0.16666666666666666	rs34510117
231722337	0.1459235617980075	0.05747126436781609	new
231579263	0.13103002523200658	0.6379310344827587	rs1765784
231594375	0.12848919129009412	0.6206896551724138	rs1765791
231487727	0.1281152624580088	0.6206896551724138	rs1765797
231497405	0.1281152624580088	0.6206896551724138	rs1765787
231498611	0.1281152624580088	0.6206896551724138	rs1765786
231499512	0.1281152624580088	0.6206896551724138	rs1765785
231515529	0.1281152624580088	0.6206896551724138	rs1765795
231523057	0.12364744933340752	0.6494252873563219	rs2808578
231586848	0.12259186374536749	0.6264367816091954	rs3120734
231586899	0.12259186374536749	0.6264367816091954	rs3125933
231341043	0.12094519498668845	0.6379310344827587	rs11122273
231341724	0.12094519498668845	0.6379310344827587	rs4486439
231346941	0.12094519498668845	0.6379310344827587	rs372392594
231350017	0.12094519498668845	0.6379310344827587	rs2250749
231350212	0.12094519498668845	0.6379310344827587	rs2250734
231350443	0.12094519498668845	0.6379310344827587	rs2572260
231350901	0.12094519498668845	0.6379310344827587	rs2250704
231351271	0.12094519498668845	0.6379310344827587	rs2474634
231352778	0.12094519498668845	0.6379310344827587	rs2437150
231355073	0.12094519498668845	0.6379310344827587	rs1687351979
231355966	0.12094519498668845	0.6379310344827587	rs2790897
231356222	0.12094519498668845	0.6379310344827587	rs2474635
231377907	0.12094519498668845	0.6379310344827587	rs2572252
231378935	0.12094519498668845	0.6379310344827587	rs2739515
231379455	0.12094519498668845	0.6379310344827587	rs2739513
231379813	0.12094519498668845	0.6379310344827587	rs2808586
231380057	0.12094519498668845	0.6379310344827587	rs139714070
231380704	0.12094519498668845	0.6379310344827587	rs2486741
231382019	0.12094519498668845	0.6379310344827587	rs10489610
231382108	0.12094519498668845	0.6379310344827587	rs10489611
231382919	0.12094519498668845	0.6379310344827587	rs2491406
231382930	0.12094519498668845	0.6379310344827587	rs2486739
231383502	0.12094519498668845	0.6379310344827587	rs2491408
231384494	0.12094519498668845	0.6379310344827587	rs2790889
231385056	0.12094519498668845	0.6379310344827587	rs973252
231402175	0.12094519498668845	0.6379310344827587	rs2749713
231402242	0.12094519498668845	0.6379310344827587	rs2790874
231584885	0.11994113041096446	0.6149425287356322	rs1655287
231453252	0.11957195542620591	0.6206896551724138	rs1765814
231466456	0.11925409745704585	0.6264367816091954	rs1769795
231163847	0.11657594382613305	0.034482758620689655	rs200729419
231463179	0.11657594382613305	0.034482758620689655	rs114928164
231398977	0.11653719275152088	0.632183908045977	rs2808600
231471136	0.11248211598830263	0.6206896551724138	rs2790860
231474293	0.11248211598830263	0.6206896551724138	rs1769798
231595597	0.10877333532004295	0.5574712643678161	rs1655304
231340798	0.10705516098322487	0.6264367816091954	rs1217838323
231631484	0.10522150386183927	0.5459770114942529	rs823167
231632793	0.10522150386183927	0.5459770114942529	rs751229
231637661	0.10522150386183927	0.5459770114942529	rs1094657
231642107	0.10522150386183927	0.5459770114942529	rs1655282
231646904	0.10522150386183927	0.5459770114942529	rs823158
231667858	0.10522150386183927	0.5459770114942529	rs1417585
231670540	0.10522150386183927	0.5459770114942529	rs4366301
231672536	0.10522150386183927	0.5459770114942529	rs11122319
231589122	0.10458422818600467	0.6724137931034483	rs1612154
231232473	0.1011976417500323	0.8505747126436781	rs11579396
231595885	0.09896960452750837	0.5689655172413793
231595984	0.09896960452750837	0.5689655172413793
231595996	0.09896960452750837	0.5689655172413793
231596415	0.09896960452750837	0.5689655172413793
231068868	0.09742764871553013	0.764367816091954
231069624	0.09742764871553013	0.764367816091954
231619133	0.09686581305526923	0.5574712643678161
231070334	0.0939852693326605	0.7413793103448276
231595782	0.09329929171820564	0.5747126436781609
231616321	0.09045750436297559	0.5747126436781609
231617541	0.09045750436297559	0.5747126436781609
231619715	0.09045750436297559	0.5747126436781609
231621314	0.09045750436297559	0.5747126436781609
231205654	0.08699381121388913	0.040229885057471264
231391051	0.07550292718955788	0.5344827586206896
231060710	0.06706049548601073	0.22988505747126436
231454811	0.06577979448928692	0.06321839080459771
231231708	0.06423399462778444	0.06896551724137931
231110993	0.0585101947589448	0.603448275862069
231109620	0.058085584139915575	0.6551724137931034
231081588	0.053266819570000165	0.16091954022988506
231120398	0.053266819570000165	0.16091954022988506
231133548	0.052169917433832445	0.16666666666666666
231133740	0.052169917433832445	0.16666666666666666
231306476	0.050687178055803486	0.5747126436781609
231134256	0.05005312353539067	0.21264367816091953
231136730	0.05005312353539067	0.21264367816091953
231299197	0.04738918149654022	0.022988505747126436
231113332	0.04561249481592007	0.16666666666666666
231114562	0.04561249481592007	0.16666666666666666
231116950	0.04561249481592007	0.16666666666666666
231118503	0.04561249481592007	0.16666666666666666
231119054	0.04561249481592007	0.16666666666666666
231084618	0.04082771143099995	0.7586206896551724
231298785	0.038713533783030454	0.028735632183908046
231207125	0.03754793734642358	0.8908045977011494
231199851	0.036510620401716716	0.8908045977011494
231200787	0.036510620401716716	0.8908045977011494
231197847	0.033630606528826726	0.028735632183908046
231181433	0.03123572985053294	0.603448275862069
231071722	0.0303973892119234	0.1839080459770115
231188795	0.028276482326287898	0.896551724137931
231188804	0.028276482326287898	0.896551724137931
231190033	0.028276482326287898	0.896551724137931
231192035	0.028276482326287898	0.896551724137931
231244163	0.021838355429652734	0.5862068965517241
231253351	0.021838355429652734	0.5862068965517241
231256676	0.021838355429652734	0.5862068965517241
231260888	0.021838355429652734	0.5862068965517241

## Sheet:  File 4
Supplementary Data File 4. iSAFE value for genetic variants of the studied locus in the
Ingush population (variants with iSAFE value > 0.1 are highlighted)
POS	iSAFE	DAF	rs
231391051	0.1817525906684635	0.5	rs2739508
231341724	0.17379999982552582	0.5294117647058824	rs4486439
231352778	0.17379999982552582	0.5294117647058824	rs2437150
231355966	0.17379999982552582	0.5294117647058824	rs2790897
231362714	0.17379999982552582	0.5294117647058824	rs1076804
231363020	0.17379999982552582	0.5294117647058824	rs910823
231366564	0.17379999982552582	0.5294117647058824	rs1435166
231368491	0.17379999982552582	0.5294117647058824	rs1572015559
231368565	0.17379999982552582	0.5294117647058824	rs2066140
231375024	0.17379999982552582	0.5294117647058824	new
231375307	0.17379999982552582	0.5294117647058824	new
231375439	0.17379999982552582	0.5294117647058824	rs2491403
231376381	0.17379999982552582	0.5294117647058824	rs2491404
231376841	0.17379999982552582	0.5294117647058824	rs2808583
231388275	0.17379999982552582	0.5294117647058824	rs2102911917
231388741	0.17379999982552582	0.5294117647058824	rs11122282
231388757	0.17379999982552582	0.5294117647058824	rs11122283
231462108	0.16276598147639276	0.5882352941176471	rs1765805
231323732	0.16109764246872849	0.5588235294117647	rs6541266
231327455	0.16109764246872849	0.5588235294117647	rs7546511
231330282	0.16109764246872849	0.5588235294117647	rs10864676
231332860	0.16109764246872849	0.5588235294117647	rs953
231334904	0.16109764246872849	0.5588235294117647	rs10489609
231515529	0.15709039553325843	0.5882352941176471	rs1765795
231523057	0.15709039553325843	0.5882352941176471	rs2808578
231453252	0.14681062357747063	0.6176470588235294	rs1765814
231466456	0.14681062357747063	0.6176470588235294	rs1769795
231471136	0.14681062357747063	0.6176470588235294	rs2790860
231474293	0.14681062357747063	0.6176470588235294	rs1769798
231487727	0.14681062357747063	0.6176470588235294	rs1765797
231497405	0.14681062357747063	0.6176470588235294	rs1765787
231498611	0.14681062357747063	0.6176470588235294	rs1765786
231499512	0.14681062357747063	0.6176470588235294	rs1765785
231241877	0.14143558656224073	0.5882352941176471	rs487047
231241944	0.14143558656224073	0.5882352941176471	rs822626
231243617	0.14143558656224073	0.5882352941176471	rs472413
231246756	0.14143558656224073	0.5882352941176471	rs524661
231250535	0.14143558656224073	0.5882352941176471	rs482031
231250866	0.14143558656224073	0.5882352941176471	rs508908
231256690	0.14143558656224073	0.5882352941176471	rs6689655
231257773	0.14143558656224073	0.5882352941176471	rs3767761
231259406	0.14143558656224073	0.5882352941176471	rs548963
231263733	0.14143558656224073	0.5882352941176471	rs513814
231265159	0.14143558656224073	0.5882352941176471	rs849714
231266156	0.14143558656224073	0.5882352941176471	rs574553
231267033	0.14143558656224073	0.5882352941176471	rs500248
231267202	0.14143558656224073	0.5882352941176471	rs495183
231267300	0.14143558656224073	0.5882352941176471	rs476210
231395881	0.13557191838056634	0.7058823529411765	rs480902
231178113	0.11043313150085377	0.6176470588235294	rs1406869
231176121	0.08801715492714289	0.6470588235294118
231176217	0.08801715492714289	0.6470588235294118
231176343	0.08801715492714289	0.6470588235294118
231178475	0.08801715492714289	0.6470588235294118
231181433	0.08801715492714289	0.6470588235294118
231595782	0.08479135058952006	0.5588235294117647
231595885	0.08479135058952006	0.5588235294117647
231595984	0.08479135058952006	0.5588235294117647
231595996	0.08479135058952006	0.5588235294117647
231596415	0.08479135058952006	0.5588235294117647
231597567	0.06723112617352701	0.6176470588235294
231597941	0.06723112617352701	0.6176470588235294
231600199	0.06723112617352701	0.6176470588235294
231600865	0.06723112617352701	0.6176470588235294
231601954	0.06723112617352701	0.6176470588235294
231602083	0.06723112617352701	0.6176470588235294
231602144	0.06723112617352701	0.6176470588235294
231602464	0.06723112617352701	0.6176470588235294
231602639	0.06723112617352701	0.6176470588235294
231602819	0.06723112617352701	0.6176470588235294
231150604	0.05458518114714231	0.7647058823529411
231166545	0.05355166362928009	0.5588235294117647
231073827	0.03823286206572261	0.9117647058823529
231072024	0.03324637180590184	0.8823529411764706
231150434	0.022944760406805483	0.35294117647058826
231150586	0.022944760406805483	0.35294117647058826
231152179	0.022944760406805483	0.35294117647058826
231154446	0.022944760406805483	0.35294117647058826
231148287	0.015603532103464185	0.3235294117647059

## Sheet:  File 5
Supplementary Data File 5. iSAFE value for genetic variants of the studied locus in the
Chechen population (variants with iSAFE value > 0.1 are highlighted)
POS	iSAFE	DAF	rs ID
231285423	0.10495990350424311	0.038461538461538464	rs147029201
231295166	0.09789407611808851	0.027472527472527472
231679011	0.09789407611808851	0.027472527472527472
231610171	0.09413050930473026	0.04945054945054945
231473370	0.07634048542895719	0.8241758241758241
231535926	0.07552440947630576	0.04395604395604396
231305678	0.07542647279133963	0.9175824175824175
231523057	0.07455280353306121	0.5659340659340659
231288071	0.07239850336714634	0.9230769230769231
231288882	0.07239850336714634	0.9230769230769231
231304273	0.07239850336714634	0.9230769230769231
231304332	0.07239850336714634	0.9230769230769231
231049022	0.07194025778169136	0.03296703296703297
231187081	0.06491911379202395	0.027472527472527472
231257619	0.06491911379202395	0.027472527472527472
231286191	0.06491911379202395	0.027472527472527472
231457692	0.06491911379202395	0.027472527472527472
231327455	0.06357789444299729	0.4175824175824176
231210486	0.062458554993864754	0.027472527472527472
231513041	0.062458554993864754	0.027472527472527472
231380704	0.0619774557001542	0.554945054945055
231391424	0.0619774557001542	0.554945054945055
231392059	0.0619774557001542	0.554945054945055
231392366	0.0619774557001542	0.554945054945055
231393171	0.0619774557001542	0.554945054945055
231393745	0.0619774557001542	0.554945054945055
231393864	0.0619774557001542	0.554945054945055
231394441	0.0619774557001542	0.554945054945055
231395420	0.0619774557001542	0.554945054945055
231395719	0.0619774557001542	0.554945054945055
231396186	0.0619774557001542	0.554945054945055
231396407	0.0619774557001542	0.554945054945055
231396979	0.0619774557001542	0.554945054945055
231397037	0.0619774557001542	0.554945054945055
231397281	0.0619774557001542	0.554945054945055
231402168	0.0619774557001542	0.554945054945055
231402175	0.0619774557001542	0.554945054945055
231402242	0.0619774557001542	0.554945054945055
231402324	0.0619774557001542	0.554945054945055
231402647	0.0619774557001542	0.554945054945055
231404441	0.0619774557001542	0.554945054945055
231487727	0.06188118684027928	0.5054945054945055
231406171	0.06168537482822985	0.5494505494505495
231407429	0.06168537482822985	0.5494505494505495
231412313	0.06168537482822985	0.5494505494505495
231414422	0.06168537482822985	0.5494505494505495
231414425	0.06168537482822985	0.5494505494505495
231412734	0.0604319484919125	0.5659340659340659
231228790	0.05949537324495028	0.016483516483516484
231295169	0.05949537324495028	0.016483516483516484
231217964	0.05879768000596006	0.04395604395604396
231419247	0.05839988736978267	0.5
231299909	0.05146379380194813	0.9395604395604396
231084618	0.05083080545598127	0.6923076923076923
231391051	0.05057693309771817	0.47802197802197804
231107465	0.047179883573287375	0.7417582417582418
231147926	0.04432657857909418	0.027472527472527472
231141712	0.044308940555395984	0.016483516483516484
231148145	0.044308940555395984	0.016483516483516484
231178713	0.044308940555395984	0.016483516483516484
231056186	0.04367780402274584	0.06593406593406594
231072562	0.04309755792763742	0.7582417582417582
231677388	0.04008996887251974	0.42857142857142855
231221356	0.03993518239519771	0.3241758241758242
231222555	0.03951140116801654	0.3516483516483517
231620084	0.03865693531626007	0.21978021978021978
231455271	0.03583602860335561	0.3021978021978022
231456157	0.03583602860335561	0.3021978021978022
231456224	0.03583602860335561	0.3021978021978022
231456880	0.03583602860335561	0.3021978021978022
231459748	0.03583602860335561	0.3021978021978022
231094272	0.03566887160376246	0.8351648351648352
231097266	0.03566887160376246	0.8351648351648352
231130714	0.03543196090893497	0.6153846153846154
231595597	0.033999817700489744	0.4945054945054945
231088266	0.03338689990219412	0.02197802197802198
231726286	0.032269415790159475	0.6538461538461539
231619133	0.03149733653688744	0.5
231207125	0.031300696090746566	0.8186813186813187
231579263	0.030934272927805637	0.5274725274725275
231584885	0.030934272927805637	0.5274725274725275
231586848	0.030934272927805637	0.5274725274725275
231586899	0.030934272927805637	0.5274725274725275
231594375	0.030934272927805637	0.5274725274725275
231631484	0.030848567638670887	0.47802197802197804
231632793	0.030848567638670887	0.47802197802197804
231637661	0.030848567638670887	0.47802197802197804
231642107	0.030848567638670887	0.47802197802197804
231646904	0.030848567638670887	0.47802197802197804
231667858	0.030848567638670887	0.47802197802197804
231670540	0.030848567638670887	0.47802197802197804
231672536	0.030848567638670887	0.47802197802197804
231095105	0.03050320903393914	0.35714285714285715
231080196	0.030214489829190623	0.3626373626373626
231086381	0.030214489829190623	0.3626373626373626
231098693	0.030214489829190623	0.3626373626373626
231099333	0.030214489829190623	0.3626373626373626
231099449	0.030214489829190623	0.3626373626373626
231099675	0.030214489829190623	0.3626373626373626
231660470	0.03010306144992649	0.46703296703296704
231589122	0.029306052912451037	0.5824175824175825
231199851	0.0288348367610364	0.7967032967032966
231200787	0.0288348367610364	0.7967032967032966
231098429	0.02835177514892412	0.36813186813186816
231574707	0.028307451114794414	0.2802197802197802
231595782	0.027718348814652793	0.5
231595885	0.027718348814652793	0.5
231595984	0.027718348814652793	0.5
231595996	0.027718348814652793	0.5
231596415	0.027718348814652793	0.5
231681096	0.027029333688781416	0.5
231592892	0.026589372789769174	0.27472527472527475
231067096	0.025945813610147965	0.25824175824175827
231597567	0.02592755280280809	0.554945054945055
231188795	0.025925638961818955	0.8021978021978022
231188804	0.025925638961818955	0.8021978021978022
231190033	0.025925638961818955	0.8021978021978022
231192035	0.025925638961818955	0.8021978021978022
231294178	0.025149197410173386	0.8131868131868132
231187272	0.024972352700945503	0.8736263736263736
231200378	0.024972352700945503	0.8736263736263736
231537462	0.0231948963990135	0.2857142857142857
231543916	0.0231948963990135	0.2857142857142857
231544935	0.0231948963990135	0.2857142857142857
231093463	0.021489275343181412	0.02197802197802198
231396566	0.02142370899849768	0.24725274725274726
231597941	0.020938459880536157	0.5659340659340659
231594508	0.020935678213487095	0.2802197802197802
231143039	0.0203269460151791	0.4340659340659341
231143107	0.0203269460151791	0.4340659340659341
231144704	0.0203269460151791	0.4340659340659341
231145071	0.0203269460151791	0.4340659340659341
231145555	0.0203269460151791	0.4340659340659341
231134455	0.018299761667034665	0.016483516483516484
231283977	0.01726123994941524	0.02197802197802198
231354359	0.011666976639809774	0.43956043956043955
231356657	0.011666976639809774	0.43956043956043955
231358592	0.011666976639809774	0.43956043956043955
231358861	0.011666976639809774	0.43956043956043955
231359509	0.011666976639809774	0.43956043956043955
231361578	0.011666976639809774	0.43956043956043955
231265139	0.011048846093975707	0.02197802197802198
231289401	0.010382312905327717	0.10989010989010989
231362975	0.009545395174739017	0.4340659340659341
231363027	0.009545395174739017	0.4340659340659341
231363490	0.009545395174739017	0.4340659340659341
231369781	0.009545395174739017	0.4340659340659341
231369955	0.009545395174739017	0.4340659340659341
231369971	0.009545395174739017	0.4340659340659341
231371160	0.009545395174739017	0.4340659340659341
231190340	0.008354282969200726	0.4340659340659341
231351672	0.006889358139076695	0.02197802197802198

## Sheet:  File 6
Supplementary Data File 6. iSAFE value for genetic variants of the studied locus in the Armenian population
(variants with iSAFE value > 0.1 are highlighted)
POS	iSAFE	DAF	rs ID
231395881	0.1928841613440577	0.7352941176470589	rs480902
231341724	0.17249334184381293	0.5588235294117647	rs4486439
231350017	0.17249334184381293	0.5588235294117647	rs2250749
231350212	0.17249334184381293	0.5588235294117647	rs2250734
231350443	0.17249334184381293	0.5588235294117647	rs2572260
231350901	0.17249334184381293	0.5588235294117647	rs2250704
231351271	0.17249334184381293	0.5588235294117647	rs2474634
231352778	0.17249334184381293	0.5588235294117647	rs2437150
231355073	0.17249334184381293	0.5588235294117647	rs1687352075
231355966	0.17249334184381293	0.5588235294117647	rs2790897
231356222	0.17249334184381293	0.5588235294117647	rs2474635
231356525	0.17249334184381293	0.5588235294117647	rs2749718
231357151	0.17249334184381293	0.5588235294117647	rs2749722
231357613	0.17249334184381293	0.5588235294117647	rs2247132
231357851	0.17249334184381293	0.5588235294117647	rs796317580
231391424	0.17249334184381293	0.5588235294117647	rs2749706
231392059	0.17249334184381293	0.5588235294117647	rs2248649
231392366	0.17249334184381293	0.5588235294117647	rs2998427
231393171	0.17249334184381293	0.5588235294117647	rs5781647
231393745	0.17249334184381293	0.5588235294117647	rs2790886
231393864	0.17249334184381293	0.5588235294117647	rs2749708
231394441	0.17249334184381293	0.5588235294117647	rs11582428
231395420	0.17249334184381293	0.5588235294117647	rs2883799
231395719	0.17249334184381293	0.5588235294117647	rs2486733
231395730	0.17249334184381293	0.5588235294117647	rs2486732
231396186	0.17249334184381293	0.5588235294117647	rs2790884
231396407	0.17249334184381293	0.5588235294117647	rs2211176
231396541	0.17249334184381293	0.5588235294117647	rs2491410
231327455	0.16769695259624348	0.5	rs7546511
231462108	0.16769695259624348	0.5	rs1765805
231597781	0.11666803487207929	0.8235294117647058	rs1617029
231188795	0.10986777111716672	0.9411764705882353	rs12063614
231188804	0.10986777111716672	0.9411764705882353	rs12074287
231190033	0.10986777111716672	0.9411764705882353	rs11122245
231207125	0.10986777111716672	0.9411764705882353	rs7526669
231207855	0.10986777111716672	0.9411764705882353	rs11804005
231595597	0.05728557875043385	0.6470588235294118
231595782	0.05728557875043385	0.6470588235294118
231595885	0.05728557875043385	0.6470588235294118
231595984	0.05728557875043385	0.6470588235294118
231595996	0.05728557875043385	0.6470588235294118
231596415	0.05728557875043385	0.6470588235294118
231176121	0.051819719112729964	0.5588235294117647
231176217	0.051819719112729964	0.5588235294117647
231176343	0.051819719112729964	0.5588235294117647
231178475	0.051819719112729964	0.5588235294117647
231181433	0.051819719112729964	0.5588235294117647
231607935	0.047770663876561585	0.6176470588235294
231614099	0.047770663876561585	0.6176470588235294
231619133	0.0463130905667814	0.5882352941176471
231631484	0.0463130905667814	0.5882352941176471
231632793	0.0463130905667814	0.5882352941176471
231637661	0.0463130905667814	0.5882352941176471
231210420	0.04608477544761194	0.6470588235294118
231213455	0.04608477544761194	0.6470588235294118
231217021	0.04608477544761194	0.6470588235294118
231219324	0.04608477544761194	0.6470588235294118
231220813	0.04608477544761194	0.6470588235294118
231642107	0.043478556902748634	0.6176470588235294
231646904	0.043478556902748634	0.6176470588235294
231178113	0.031709752216750195	0.5294117647058824
231225759	0.027599449982978363	0.7352941176470589
231190340	0.02514298012005301	0.6470588235294118
231097644	0.015239751521351985	0.058823529411764705
231109054	0.015239751521351985	0.058823529411764705
231179827	0.015239751521351985	0.058823529411764705
231252068	0.01209662651373282	0.058823529411764705
231265139	0.01209662651373282	0.058823529411764705
231149900	0.011188919347108181	0.4411764705882353
231112113	0.011186873374237485	0.5
231114022	0.011186873374237485	0.5
231116597	0.010927906612054318	0.47058823529411764
231117483	0.010927906612054318	0.47058823529411764
231118731	0.010927906612054318	0.47058823529411764
231120035	0.010927906612054318	0.47058823529411764
231121112	0.010927906612054318	0.47058823529411764
231136202	0.010927906612054318	0.47058823529411764
231159054	0.010664261684759566	0.08823529411764706
231159057	0.010664261684759566	0.08823529411764706
231110865	0.01004359036977356	0.08823529411764706

## Sheet:  File 7
Supplementary Data File 7. Genetic variants with a significant iSAFE value shared
by two or more ethnic groups
Position on chromosome 1	rs ID	Population	References	Populations for which previously confirmed
231352778	rs2437150	Armenians/Balkars/Ingush/Karachays	Bigham et al., 2010; Brutsaertet et al., 2019; Guo et al., 2020; Liu et al., 2020; Moksnes et al., 2022; Zheng et al., 2023; Tang et al., 2024	Quechua, Tibetans
231341724	rs4486439	Armenians/Balkars/Ingush/Karachays	Has not previously been associated with human adaptation to high altitudes
231466456	rs1769795	Balkars/Ingush/Karachays	Bigham et al., 2010; Guo et al., 2020	Tibetans, Andean populations
231471136	rs2790860	Balkars/Ingush/Karachays	Has not previously been associated with human adaptation to high altitudes
231474293	rs1769798	Balkars/Ingush/Karachays	Has not previously been associated with human adaptation to high altitudes
231453252	rs1765814	Balkars/Ingush/Karachays	Has not previously been associated with human adaptation to high altitudes
231515529	rs1765795	Balkars/Ingush/Karachays	Has not previously been associated with human adaptation to high altitudes
231487727	rs1765797	Balkars/Ingush/Karachays	Has not previously been associated with human adaptation to high altitudes
231497405	rs1765787	Balkars/Ingush/Karachays	Has not previously been associated with human adaptation to high altitudes
231498611	rs1765786	Balkars/Ingush/Karachays	Has not previously been associated with human adaptation to high altitudes
231499512	rs1765785	Balkars/Ingush/Karachays	Has not previously been associated with human adaptation to high altitudes
231350017	rs2250749	Armenians/Balkars/Karachays	Has not previously been associated with human adaptation to high altitudes
231350212	rs2250734	Armenians/Balkars/Karachays	Has not previously been associated with human adaptation to high altitudes
231327455	rs7546511	Armenians/Balkars/Ingush	Has not previously been associated with human adaptation to high altitudes
231355966	rs2790897	Armenians/Ingush/Karachays	Has not previously been associated with human adaptation to high altitudes
231382930	rs2486739	Balkars/Karachays	Has not previously been associated with human adaptation to high altitudes
231341043	rs11122273	Balkars/Karachays	Has not previously been associated with human adaptation to high altitudes
231380704	rs2486741	Balkars/Karachays	Pagani et al. 2012; Li et al. 2013; Guo et al., 2020	populations of Dagestan, Tibetans
231395730	rs2486732	Armenians/Balkars	Bigham et al., 2010	Tibetans, Andean populations
231396541	rs2491410	Armenians/Balkars	Has not previously been associated with human adaptation to high altitudes
231391424	rs2749706	Armenians/Balkars	Has not previously been associated with human adaptation to high altitudes
231392059	rs2248649	Armenians/Balkars	Has not previously been associated with human adaptation to high altitudes
231392366	rs2998427	Armenians/Balkars	Has not previously been associated with human adaptation to high altitudes
231393171	rs5781647	Armenians/Balkars	Has not previously been associated with human adaptation to high altitudes
231393745	rs2790886	Armenians/Balkars	Has not previously been associated with human adaptation to high altitudes
231366564	rs1435166	Balkars/Ingush	Has not previously been associated with human adaptation to high altitudes
231375024	new	Balkars/Ingush	Has not previously been associated with human adaptation to high altitudes
231368565	rs2066140	Balkars/Ingush	Bigham et al., 2010; Li et al. 2013; Zhanget al. 2014; Pan Zhanget al. 2019; Guo et al., 2020; Shen et al., 2020	Tibetans, Andean populations
231323732	rs6541266	Balkars/Ingush	Has not previously been associated with human adaptation to high altitudes
231330282	rs10864676	Balkars/Ingush	Has not previously been associated with human adaptation to high altitudes
231332860	rs953	Balkars/Ingush	Has not previously been associated with human adaptation to high altitudes
231334904	rs10489609	Balkars/Ingush	Timoteo et al., 2023	genetic determinants of hemoglobin concentration
231523057	rs2808578	Ingush/Karachays	Has not previously been associated with human adaptation to high altitudes
231523057	rs2808578	Ingush/Karachays	Has not previously been associated with human adaptation to high altitudes
231462108	rs1765805	Armenians/Ingush	Bigham et al., 2010; Guo et al., 2020	Tibetans, Andean populations
231395881	rs480902	Armenians/Ingush	Pagani et al. 2012 и еще 20 исследованийPagani et al. 2012; Brutsaertet et al., 2019; Shen et al. 2020; Yasukochi et al. 2020	Populations of Dagestan, Andes and Tibetans
231350443	rs2572260	Armenians/Karachays	Has not previously been associated with human adaptation to high altitudes
231350901	rs2250704	Armenians/Karachays	Has not previously been associated with human adaptation to high altitudes
231351271	rs2474634	Armenians/Karachays	Has not previously been associated with human adaptation to high altitudes
231355073	rs1687352075	Armenians/Karachays	Has not previously been associated with human adaptation to high altitudes
231356222	rs2474635	Armenians/Karachays	Has not previously been associated with human adaptation to high altitudes
